# Supplementary material for: Cobalt catalysed aminocarbonylation of thiols in batch and flow for the preparation of amides
Source: Royal Society of Chemistry journal article supplement (doi:10.1039/d1ra04736a), 2021-01-01

ELECTRONIC SUPPLEMENTARY INFORMATION

**Cobalt catalysed aminocarbonylation of thiols in batch and flow for the preparation of amides**

Jose Maria Orduña, Gema Domínguez and Javier Pérez Castells\*

*N*-benzyl-4-methoxybenzamide, (**1**).

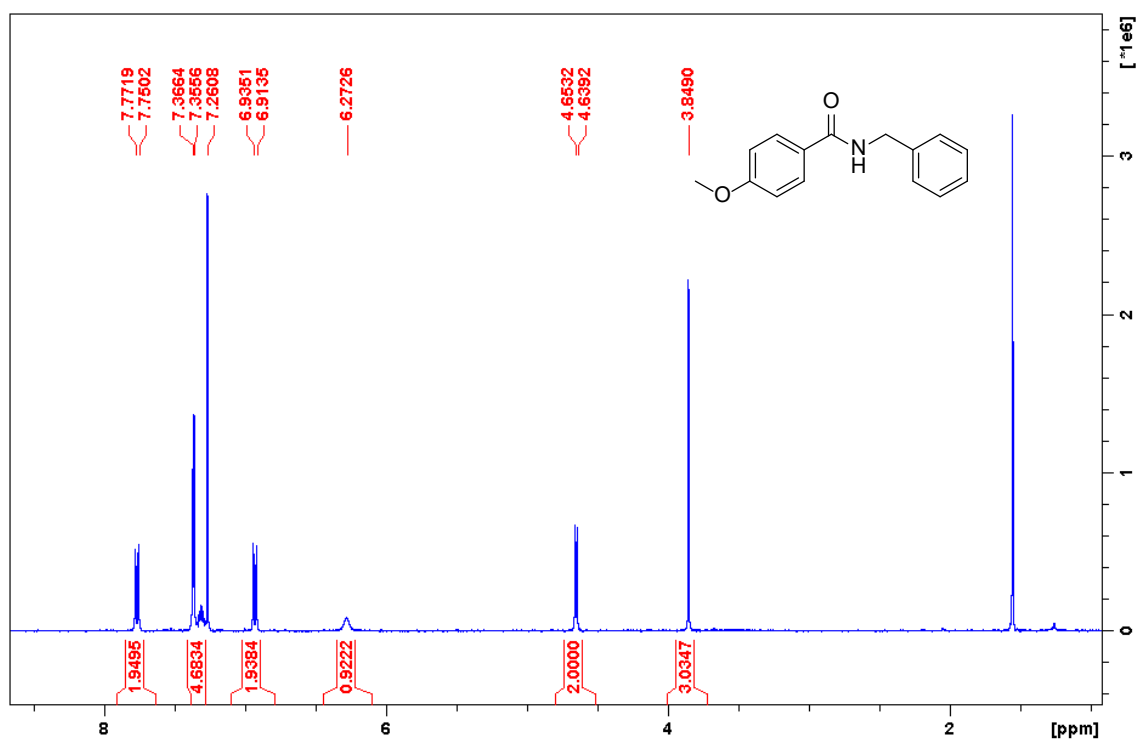

*N*-(4-chlorobenzyl)-4-methoxybenzamide, (**5**).

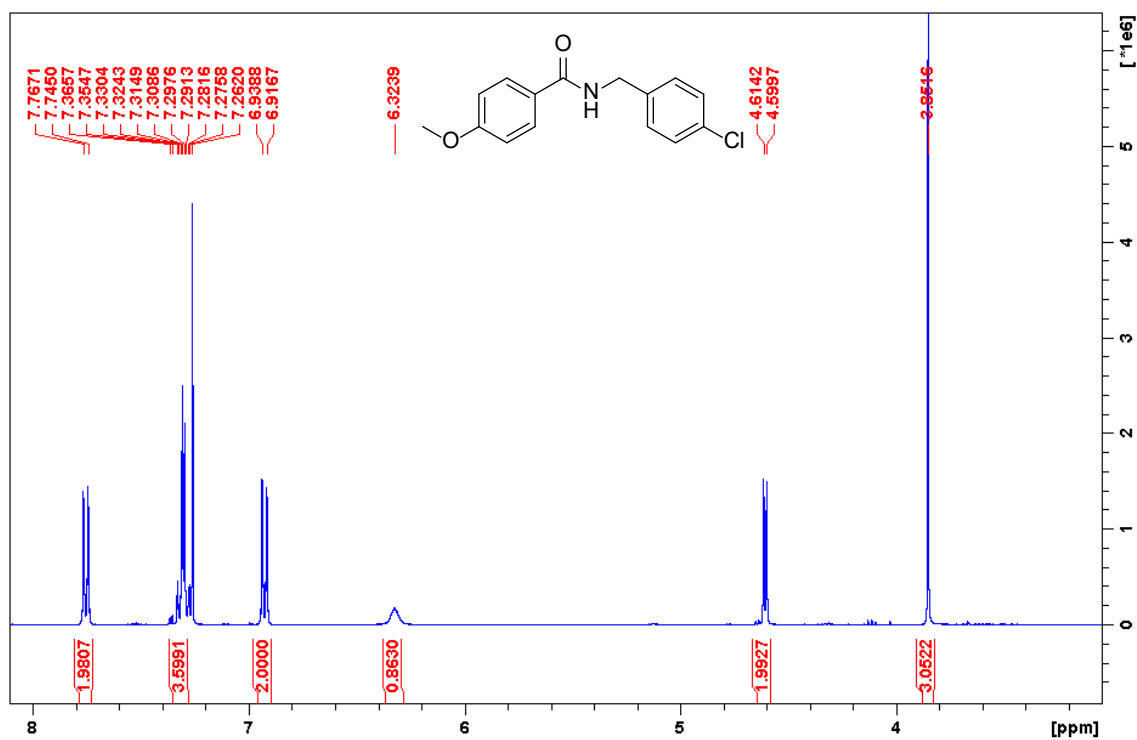

4-methoxy-N-(4-methoxybenzyl)benzamide, (**7**).

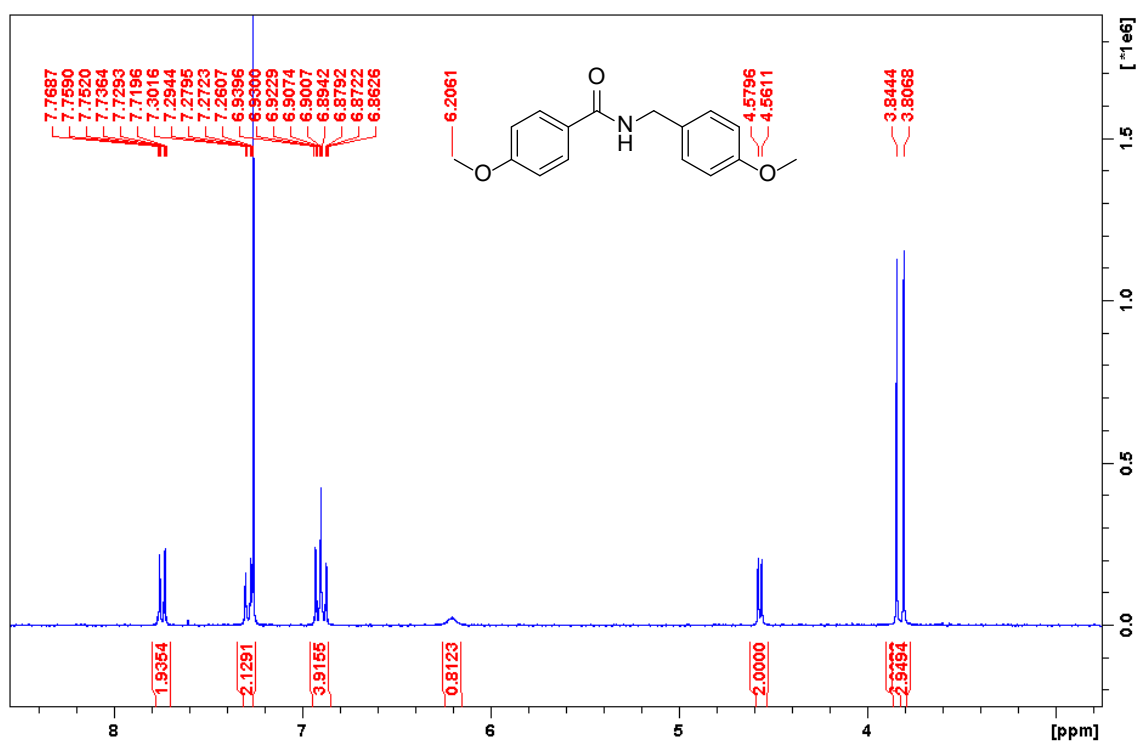

4-methoxy-N-phenethylbenzamide, (**8**).

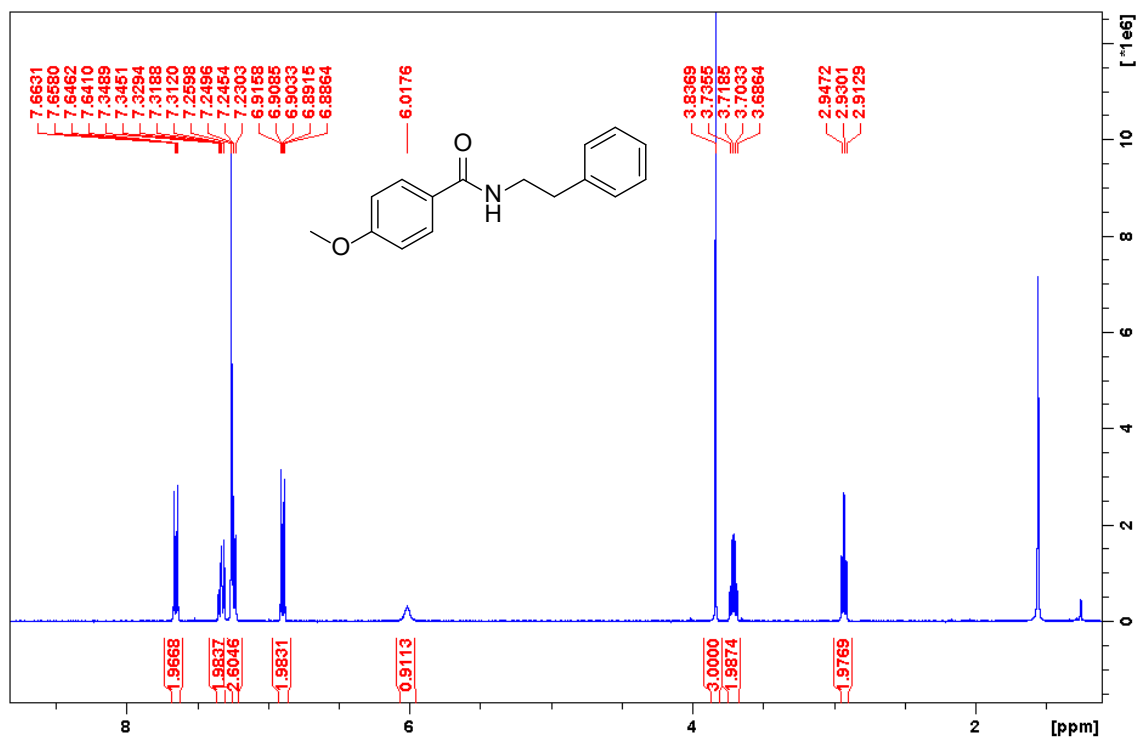

*N*-(4-chlorophenethyl)-4-methoxybenzamide, (9).

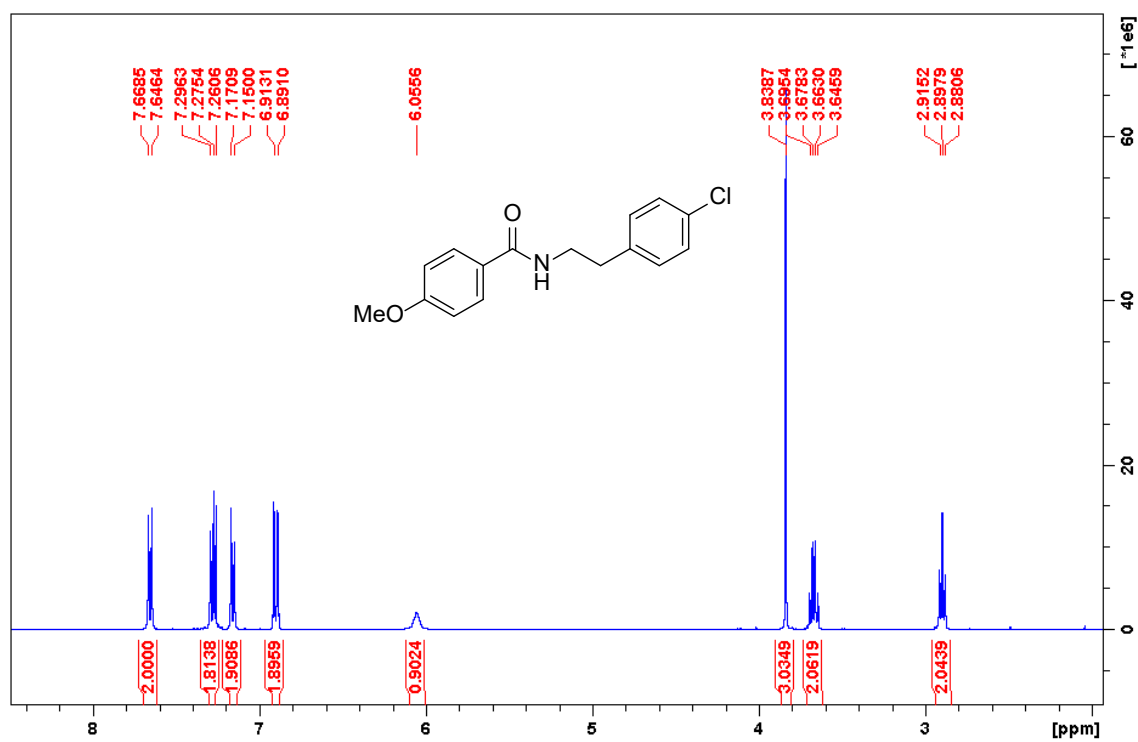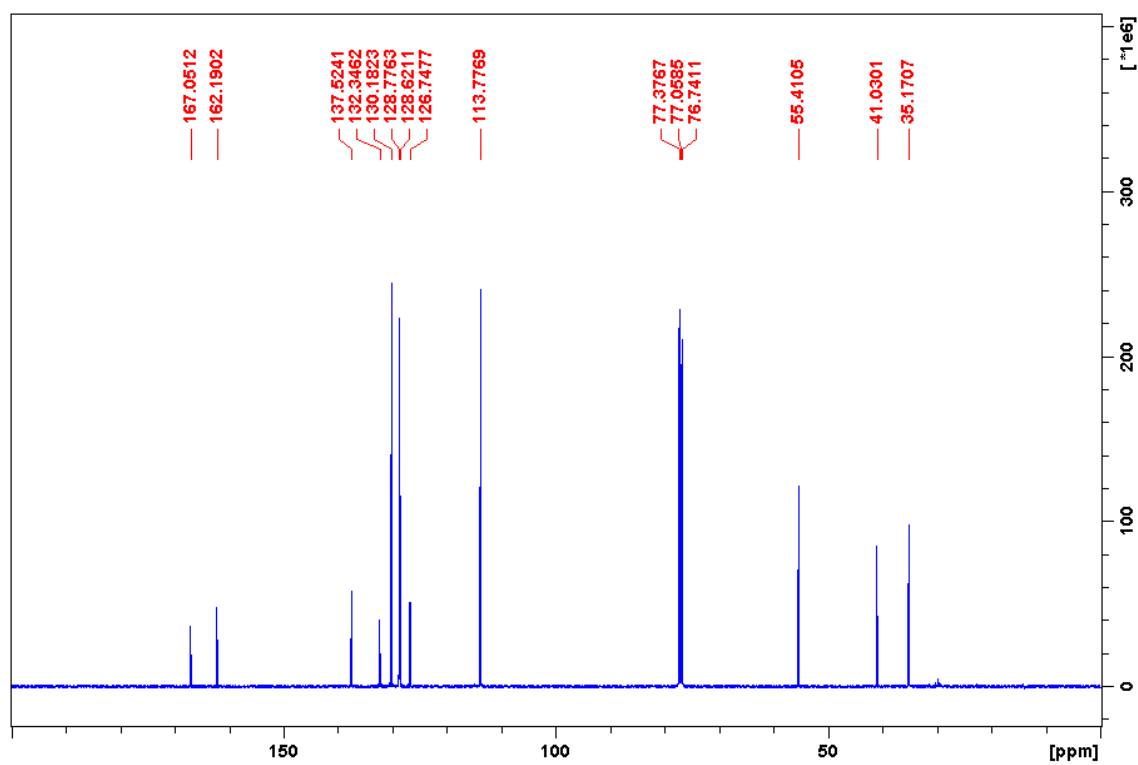

*N*-(4-methoxyphenethyl)-4-methoxybenzamide, (**10**)

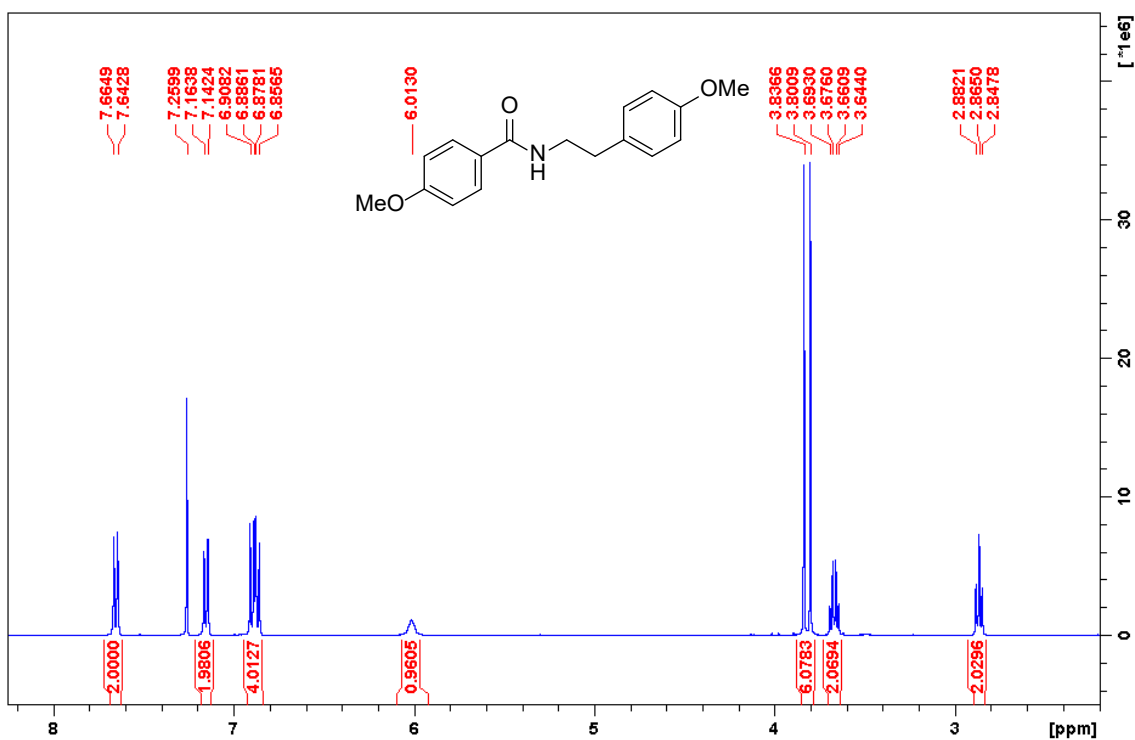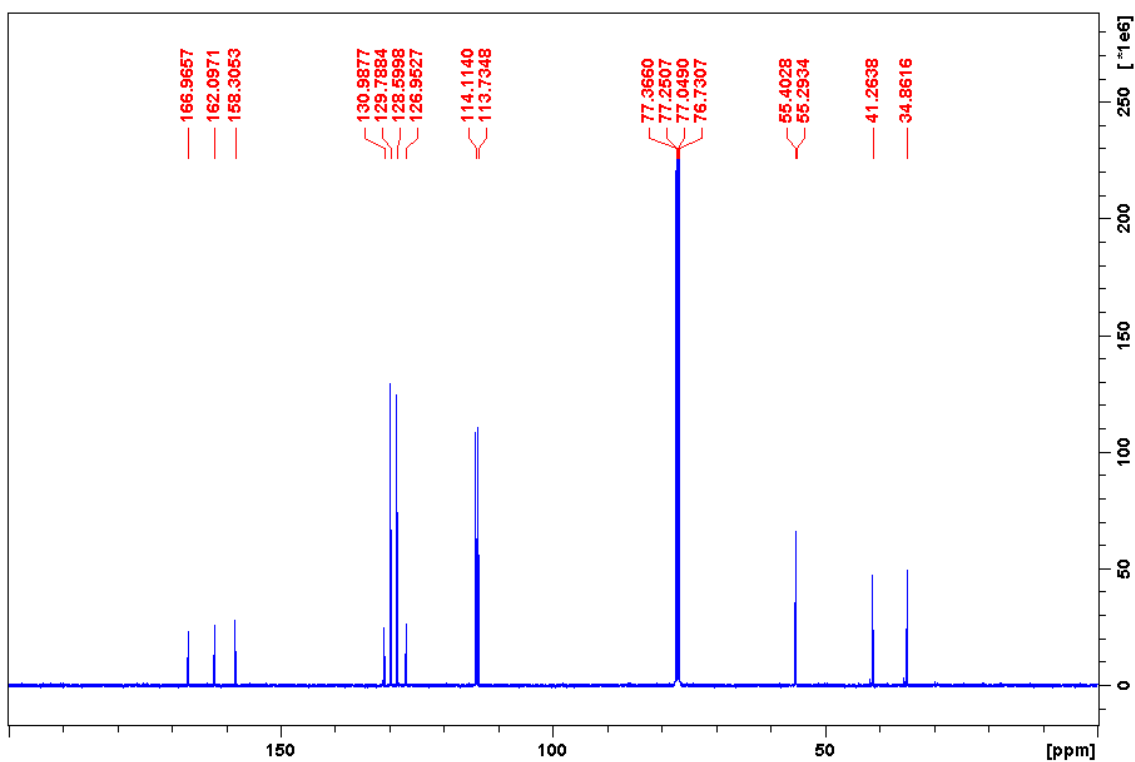

*N*-(3,4-dimethoxyphenethyl)-4-methoxybenzamide, (**11**).

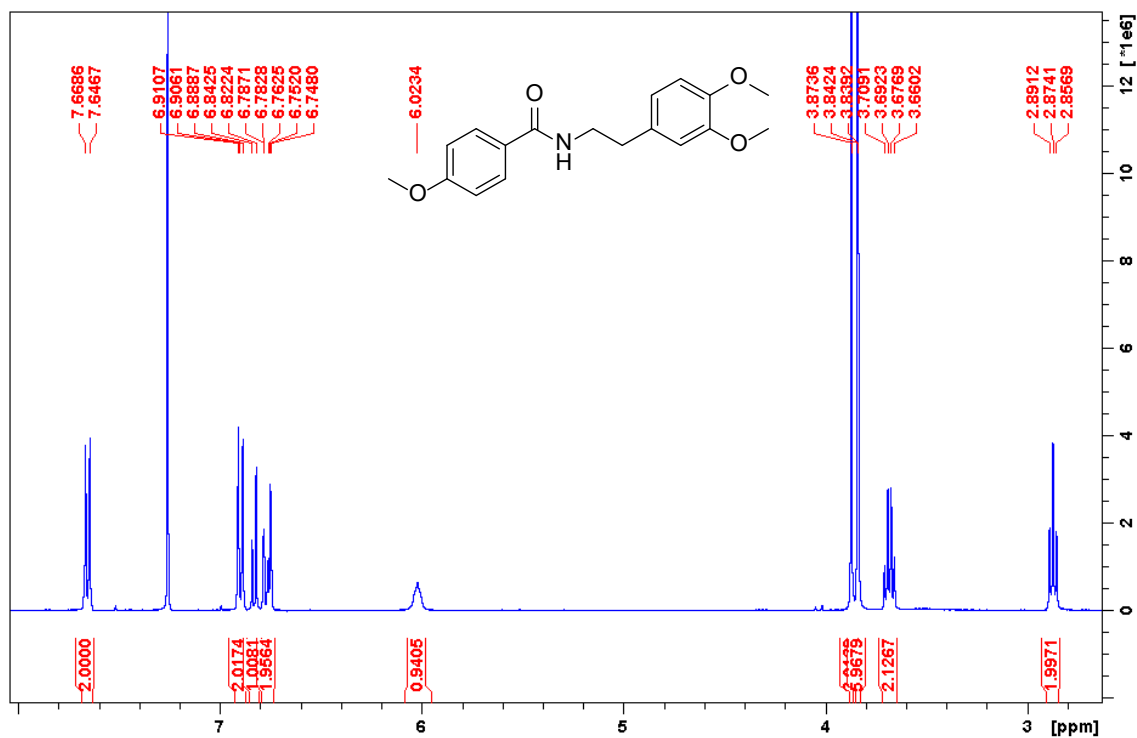

*N*-cyclohexyl-4-methoxybenzamide, (**12**).

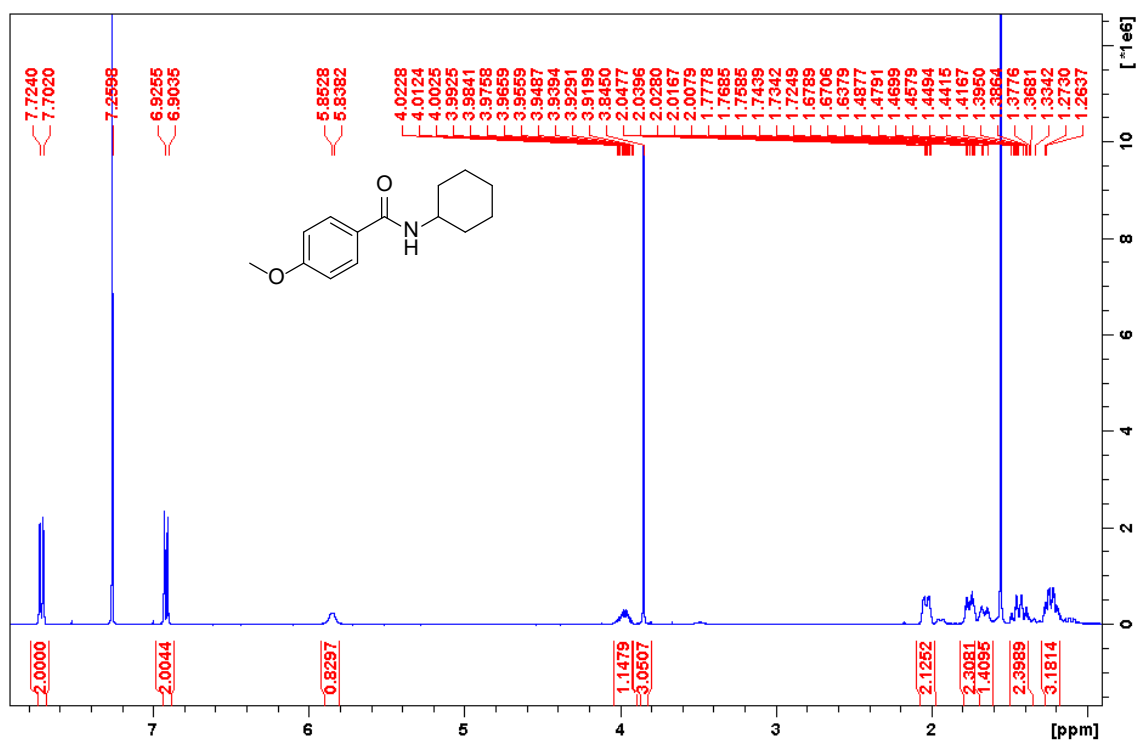

4-Methoxy-N-(pyridin-3-ylmethyl)benzamide, (**13**).

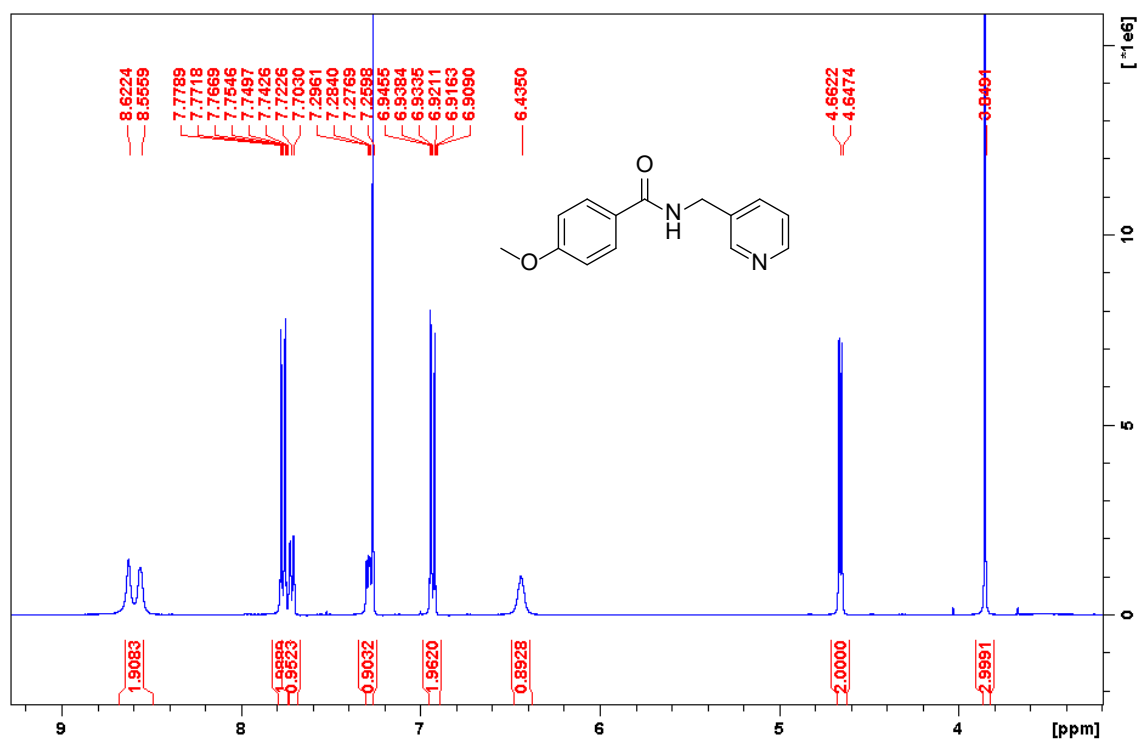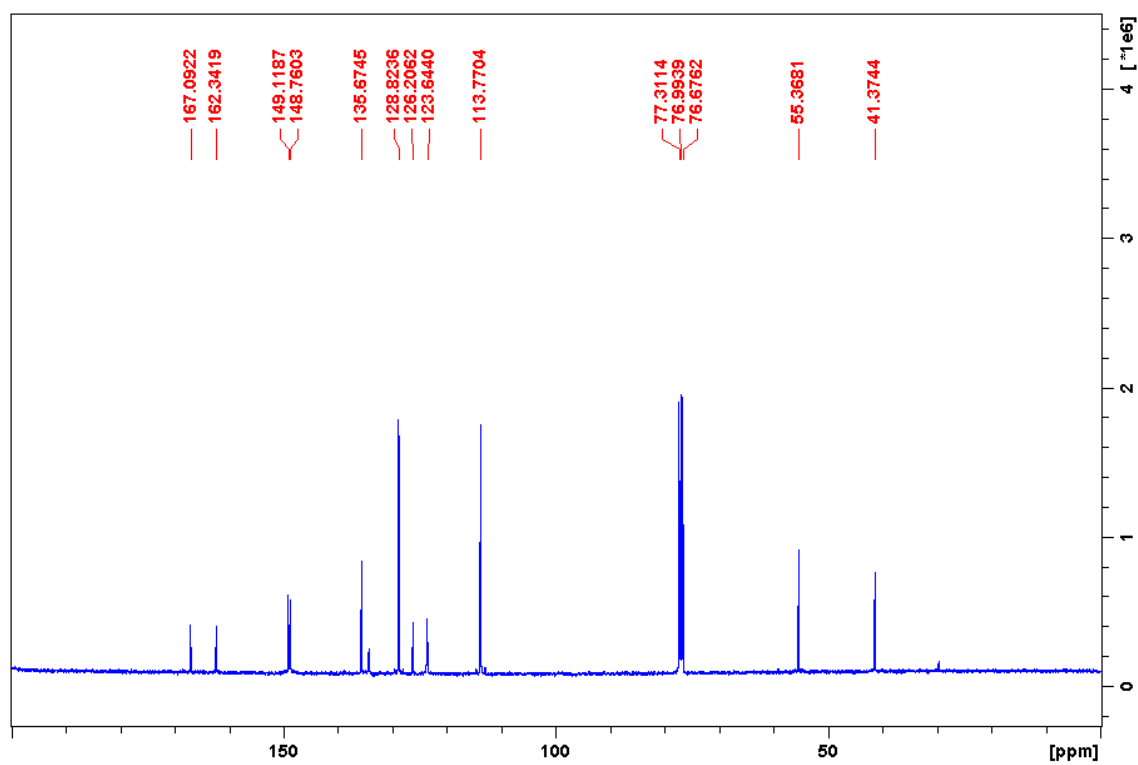

4-methoxy-N-(pyridin-2-ylmethyl)benzamide, (14).

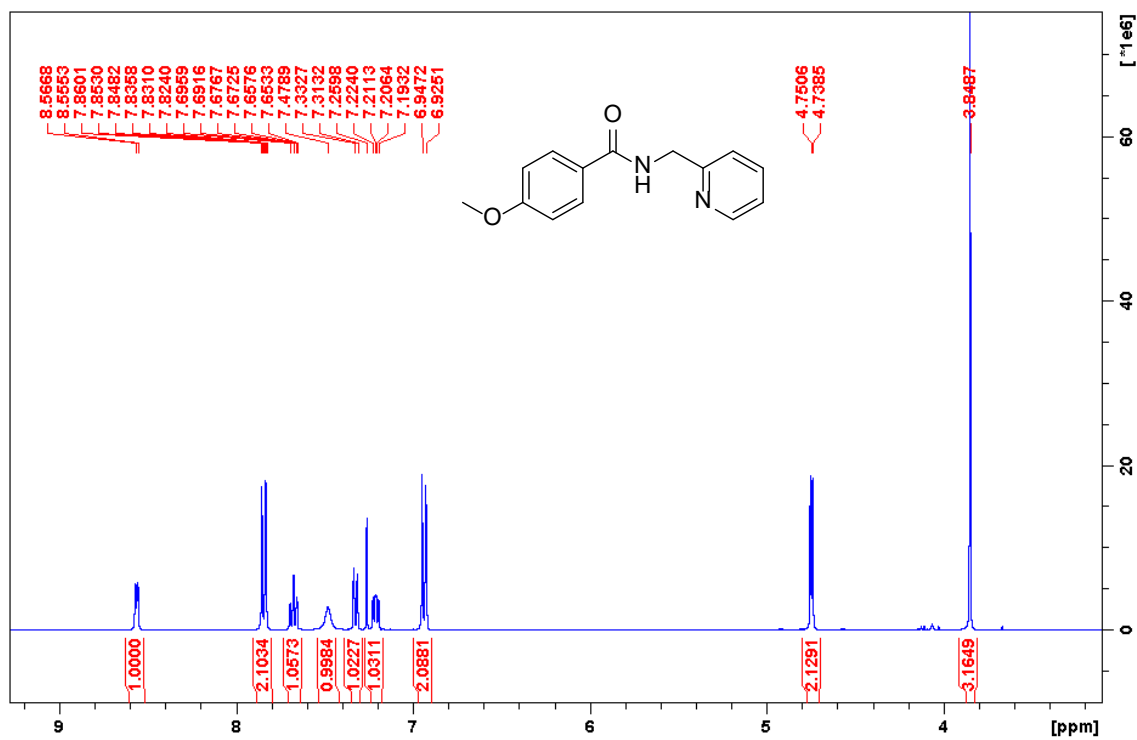

4-Methoxy-N-(3-morpholinopropyl)benzamide, (15).

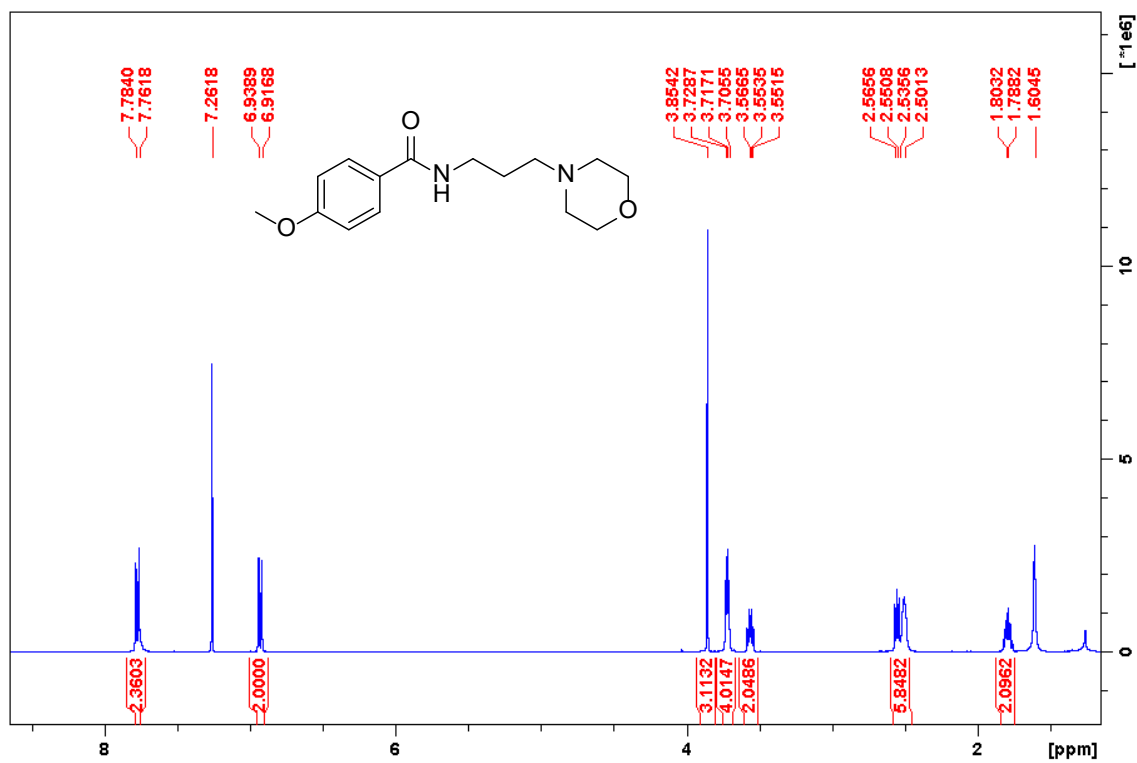



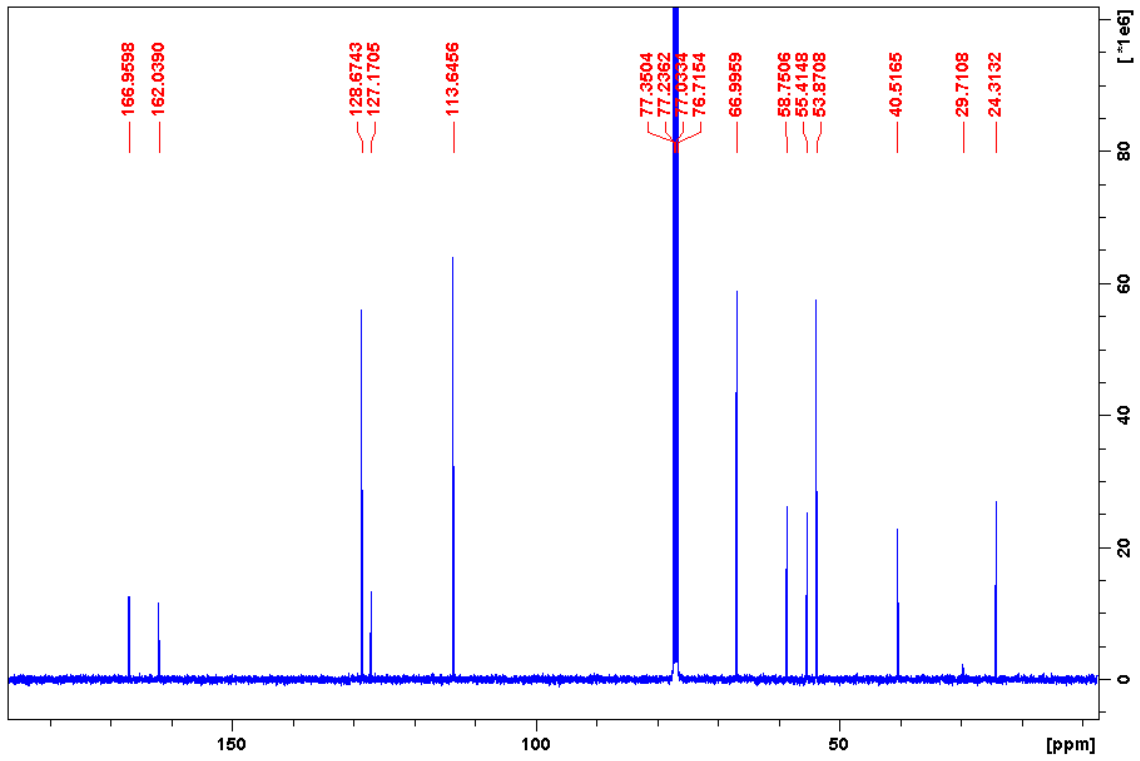

*N*-(2-(1H-indol-3-yl)ethyl)-4-methoxybenzamide, (16).

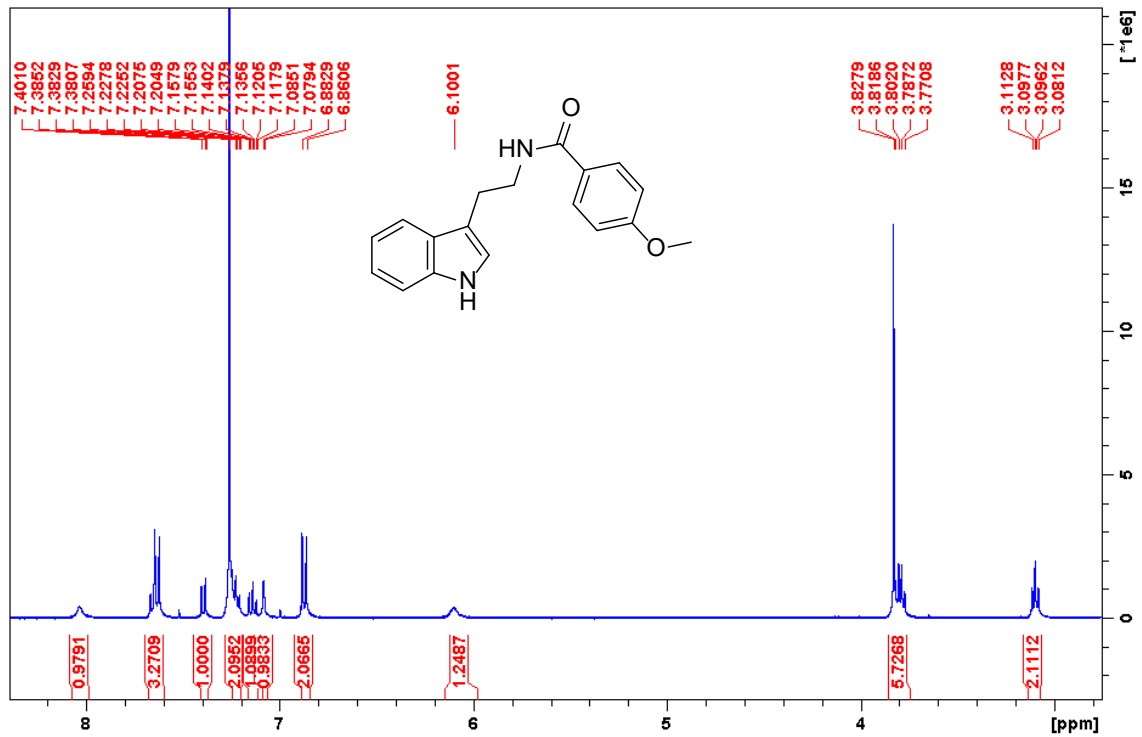

*N*-(4-isopropylphenyl)-4-methoxybenzamide, (**17**).

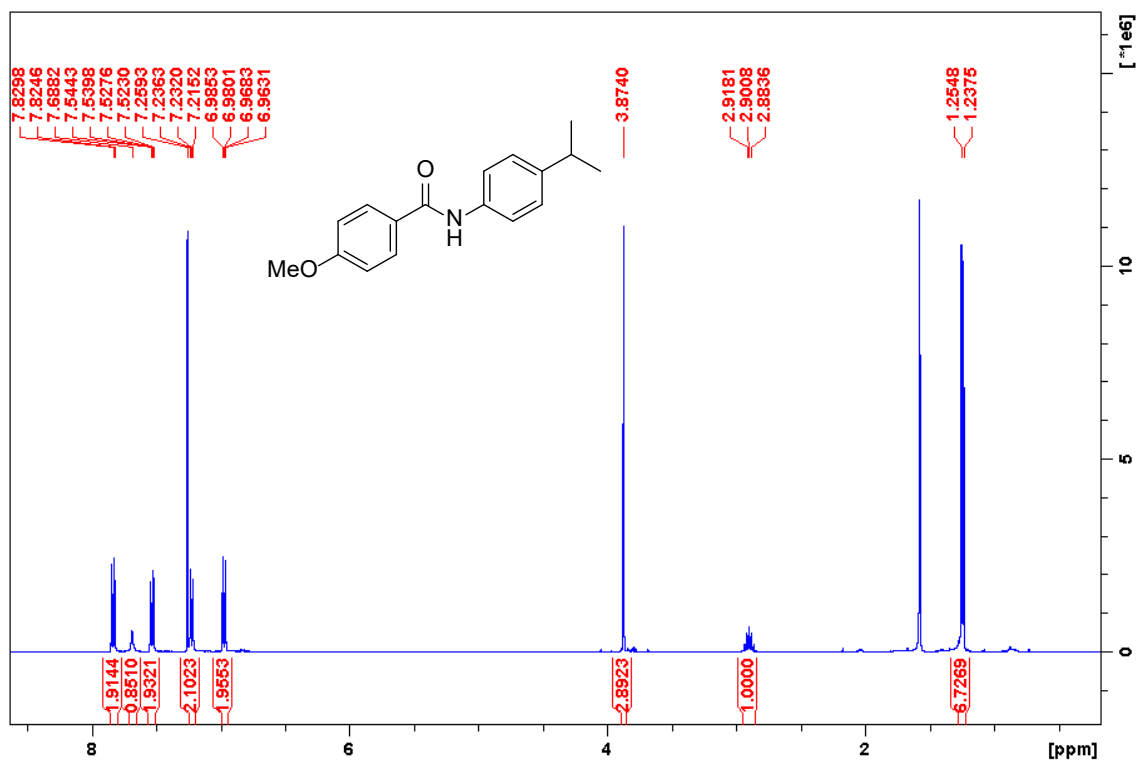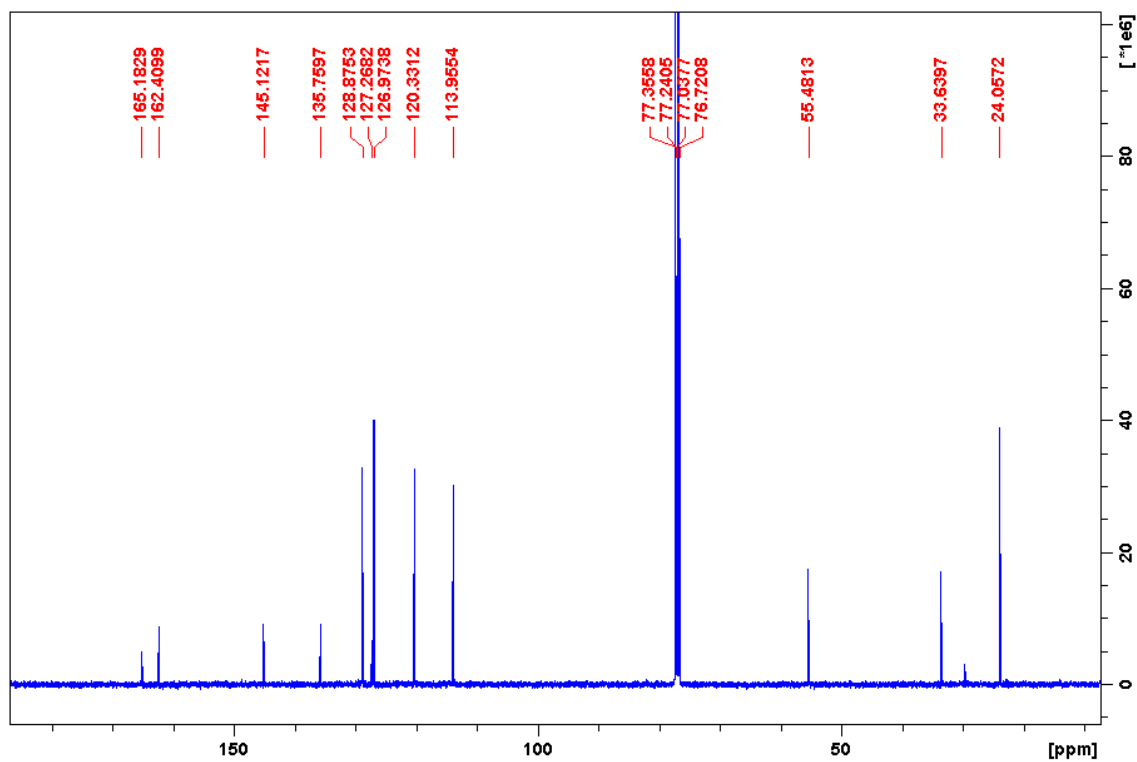

*N*-(4-methoxyphenyl)4-methoxybenzamide, (**18**).

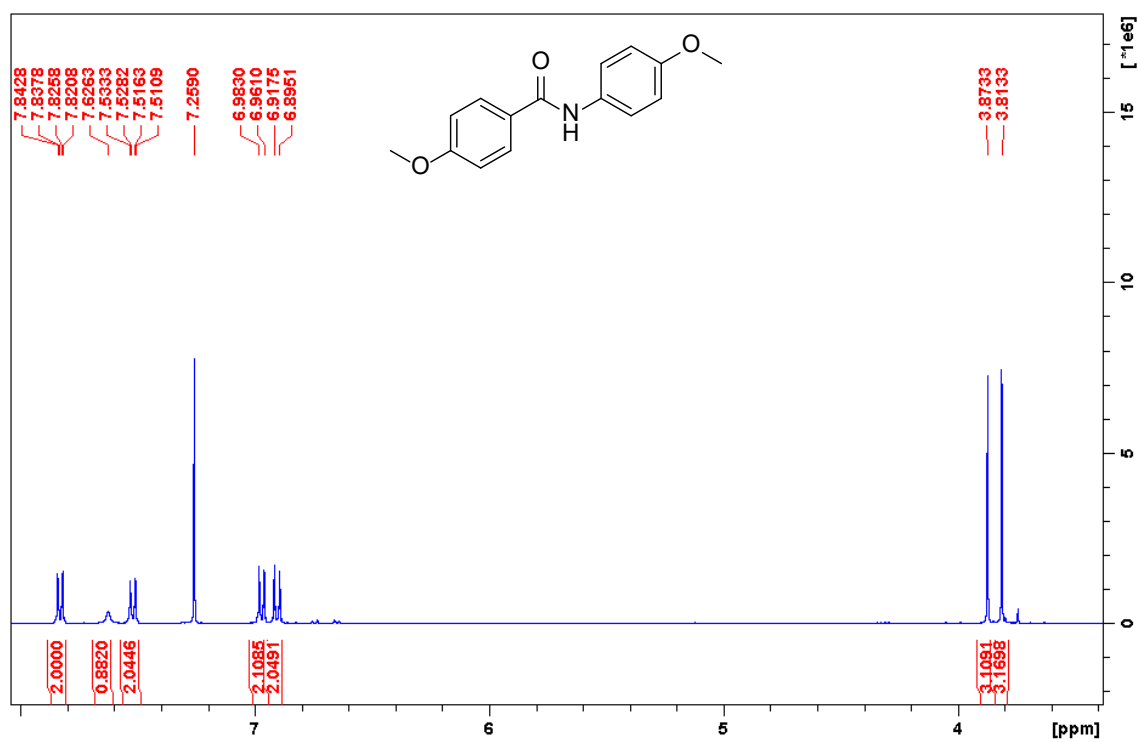

*N*-(4-fluorophenyl)4-methoxybenzamide, (**19**).

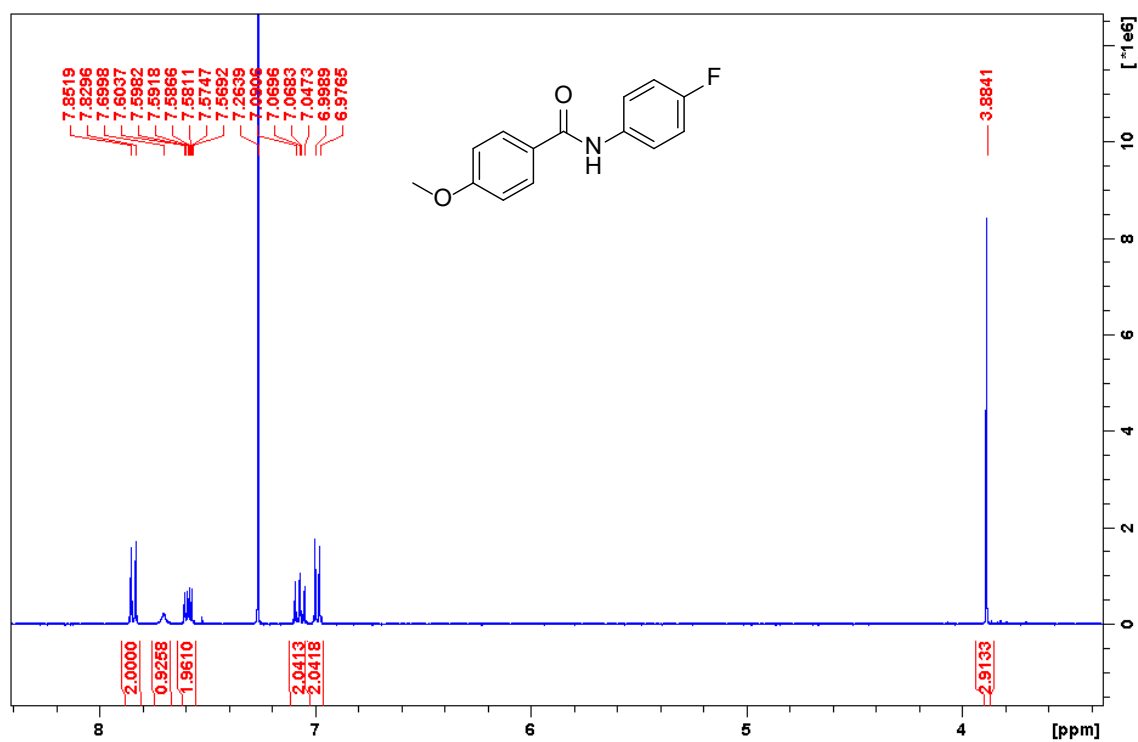

*N*-(4-chlorobenzyl)benzamide, (**20**).

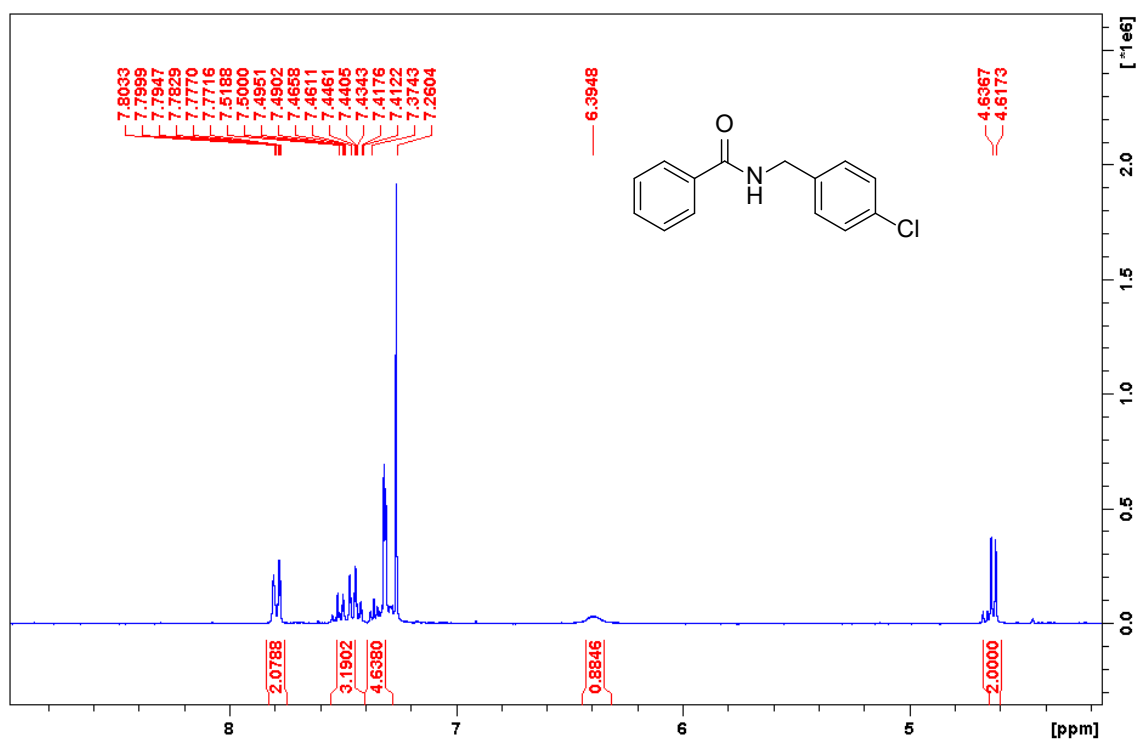

4-bromo-*N*-(4-chlorobenzyl)benzamide, (**21**).

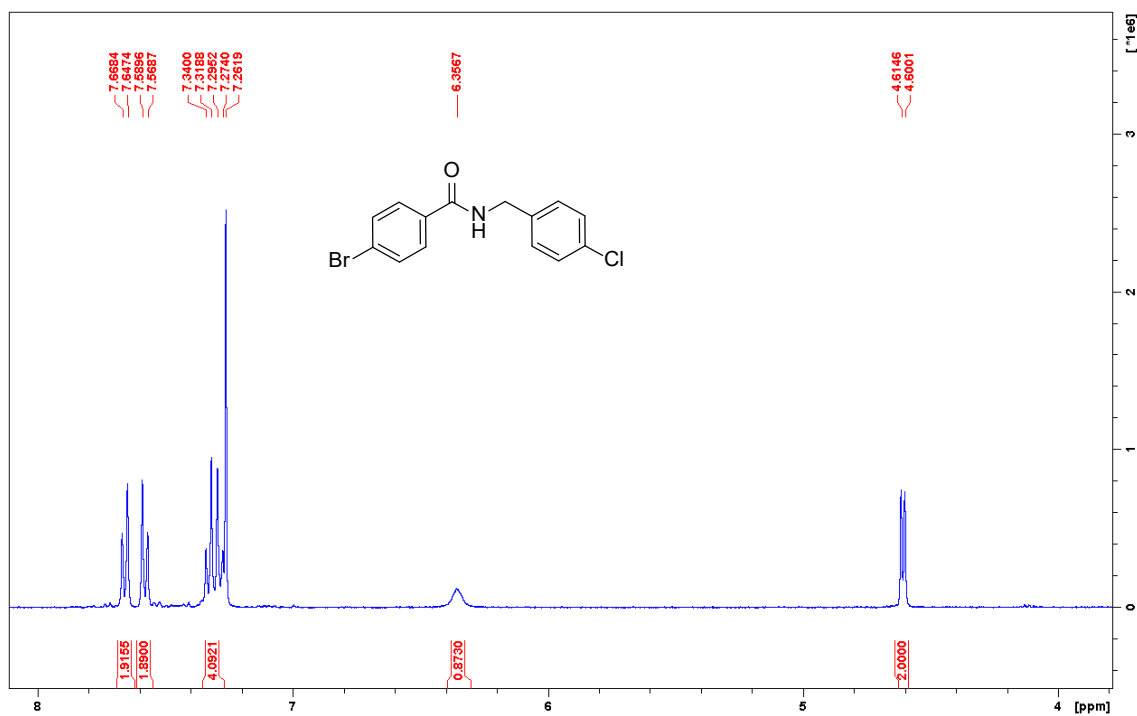

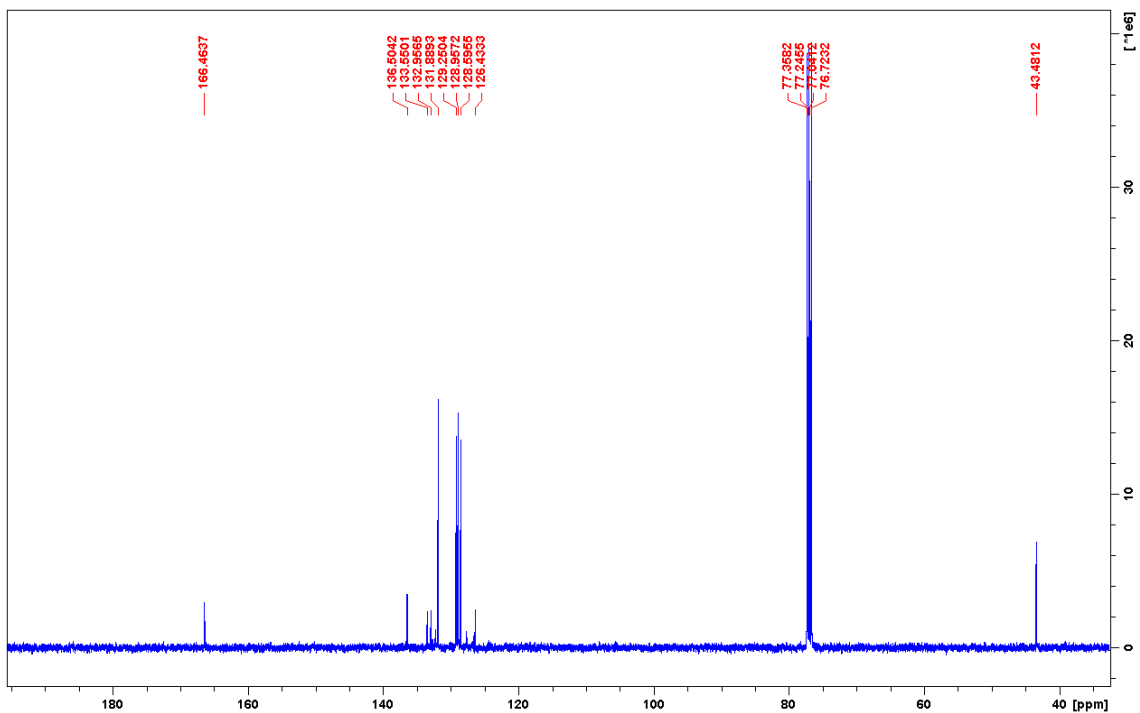

*N*-(4-chlorobenzyl)-2-phenylacetamide, (22).

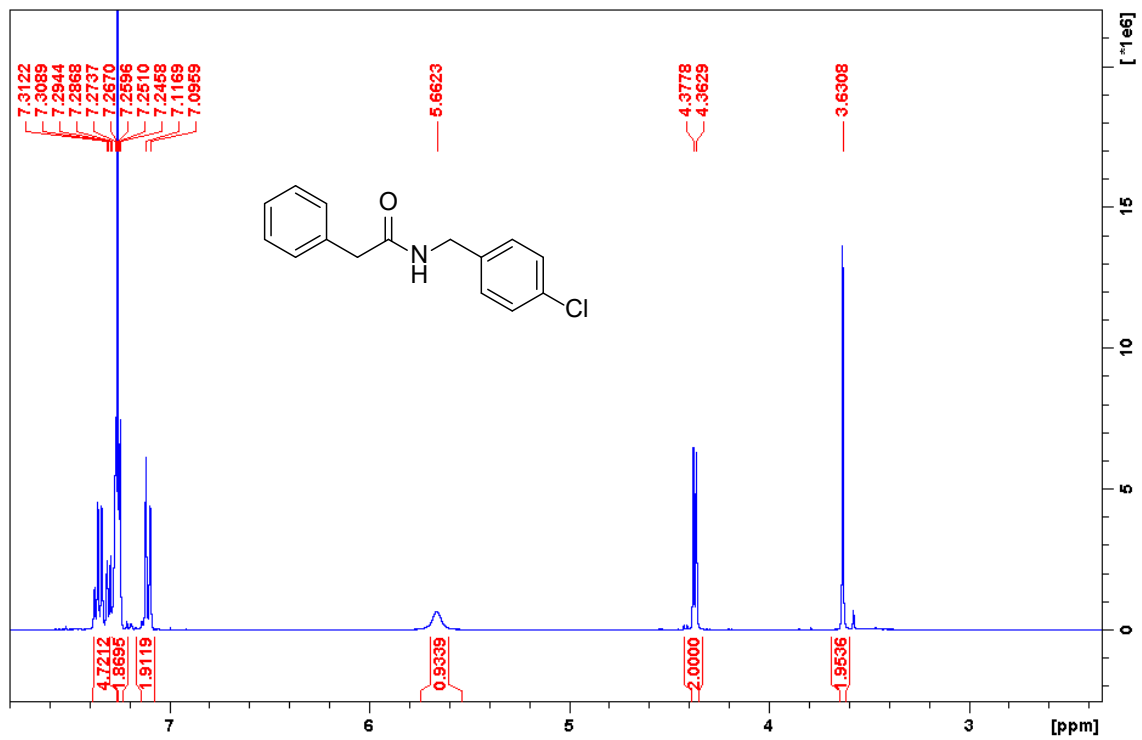

*N*-(4-chlorophenethyl)-2-phenylacetamide, (**23**).

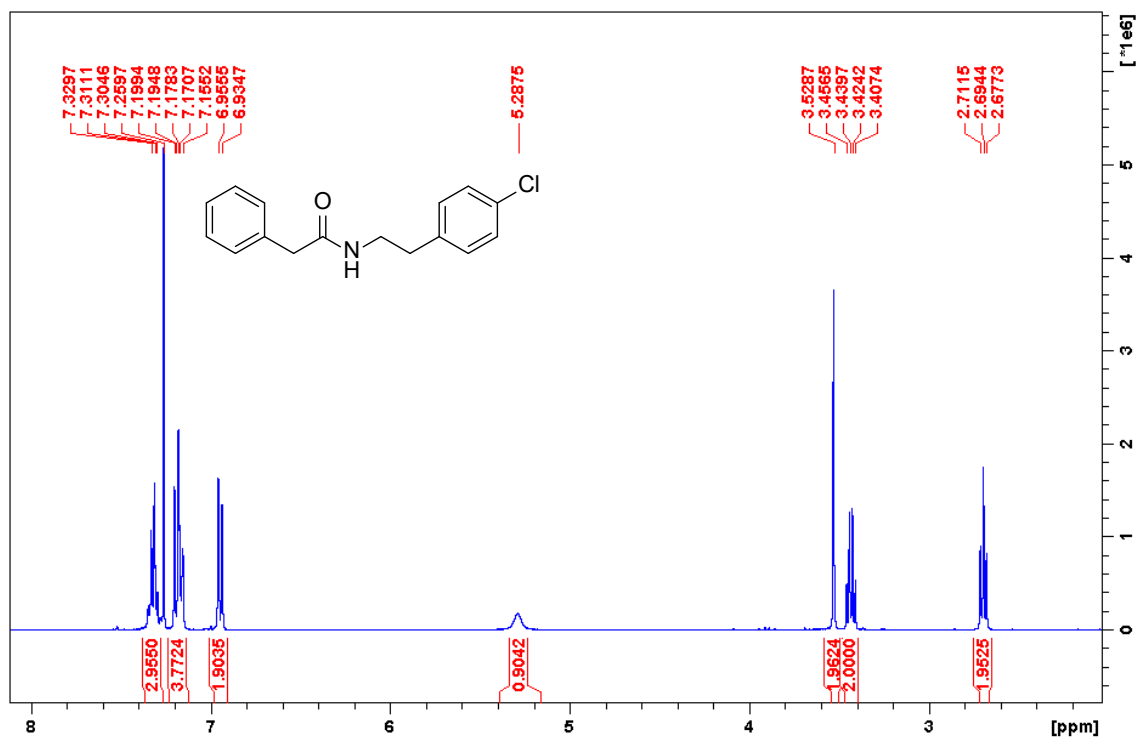

*N*-(4-chlorophenethyl)pentanamide, (**24**).

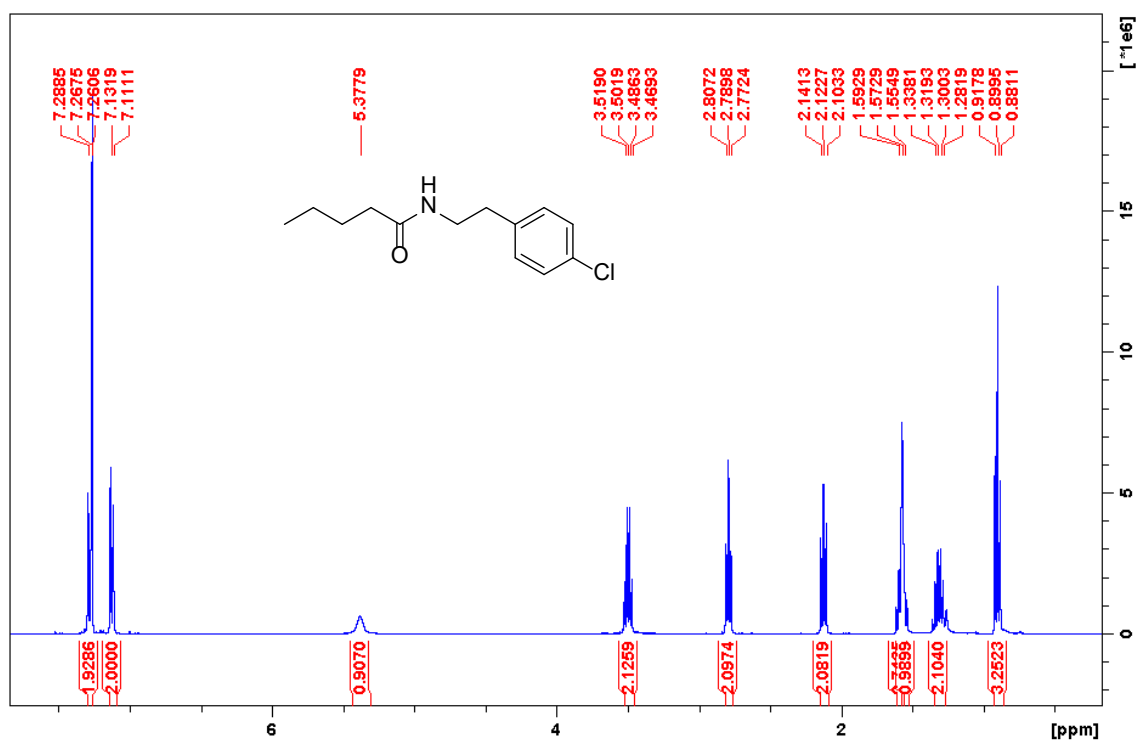

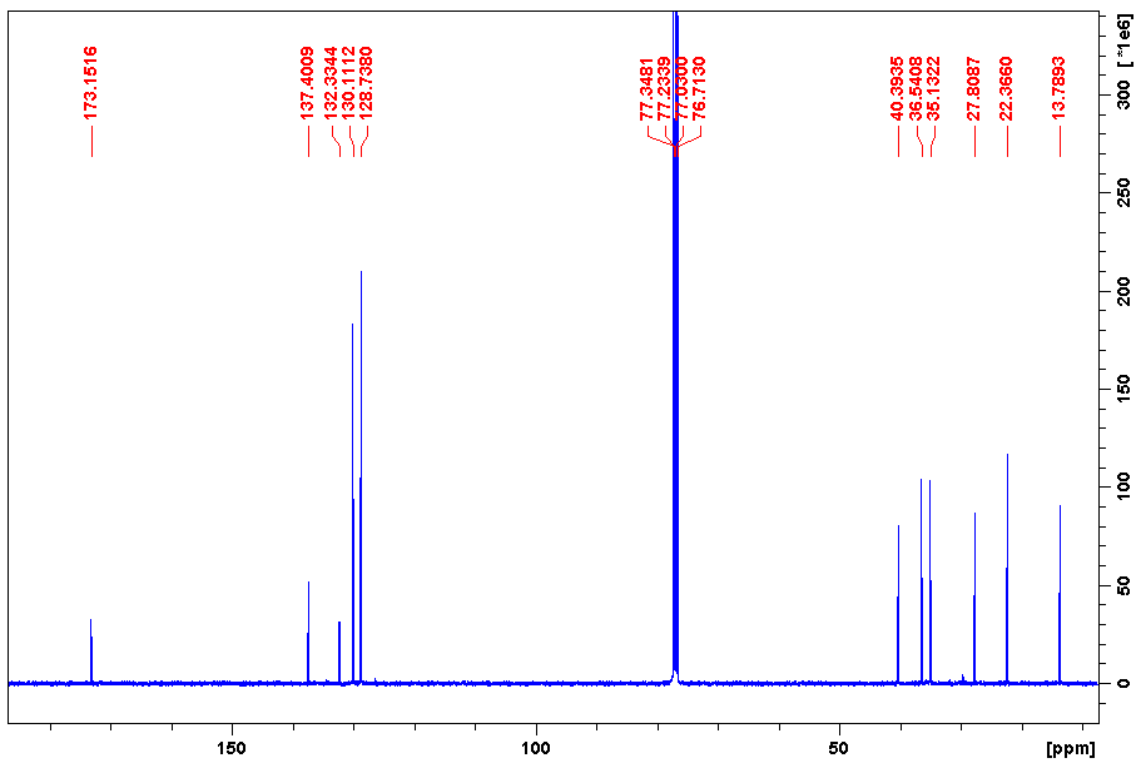

*N*-(4-chlorobenzyl)cyclohexanecarboxamide, (25).

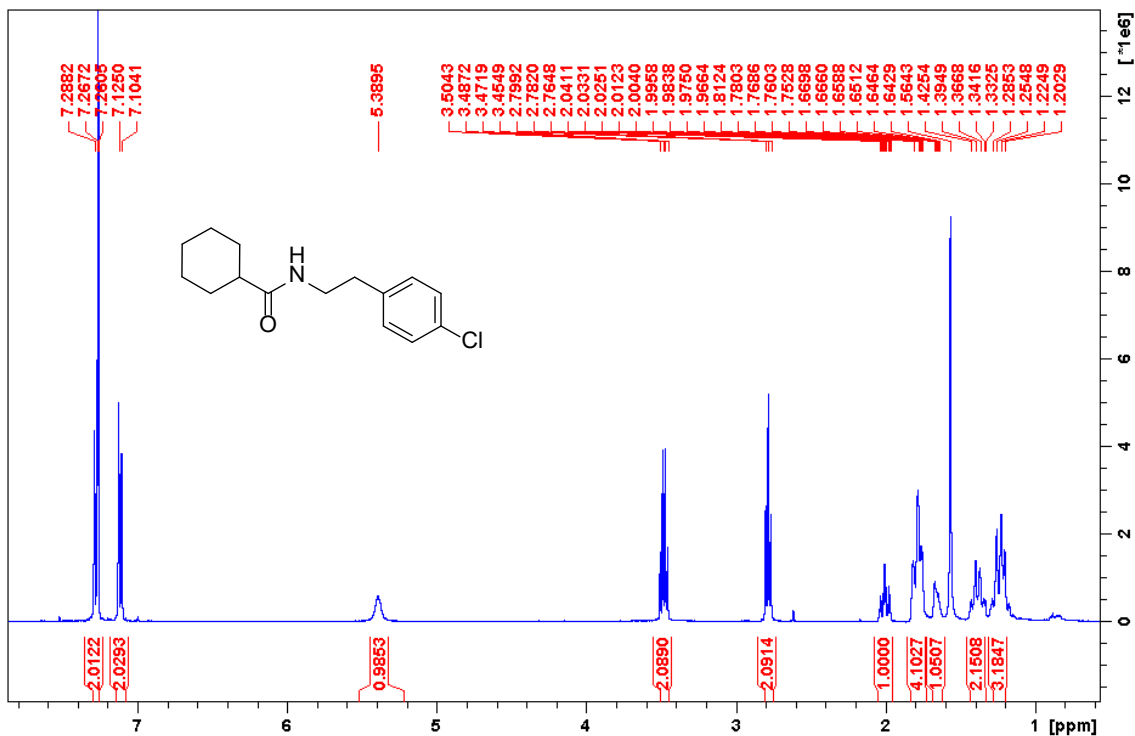

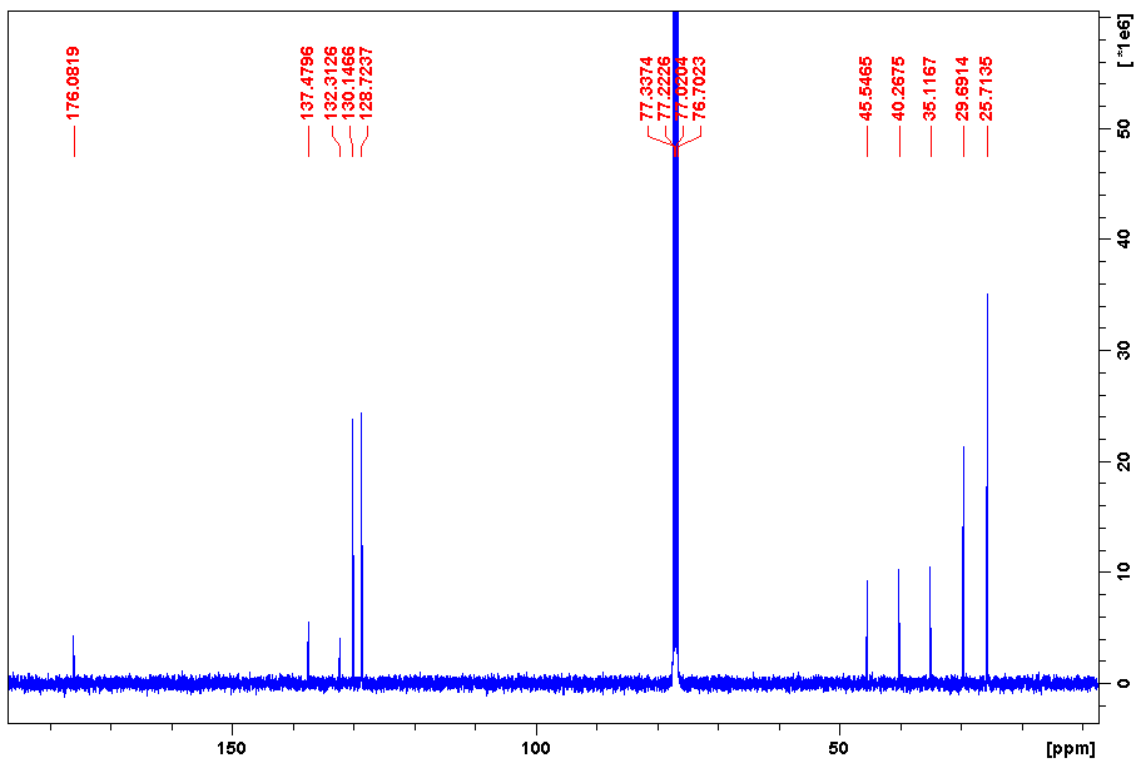

N-(4-chlorobenzyl)cyclohexanecarboxamide, (26).

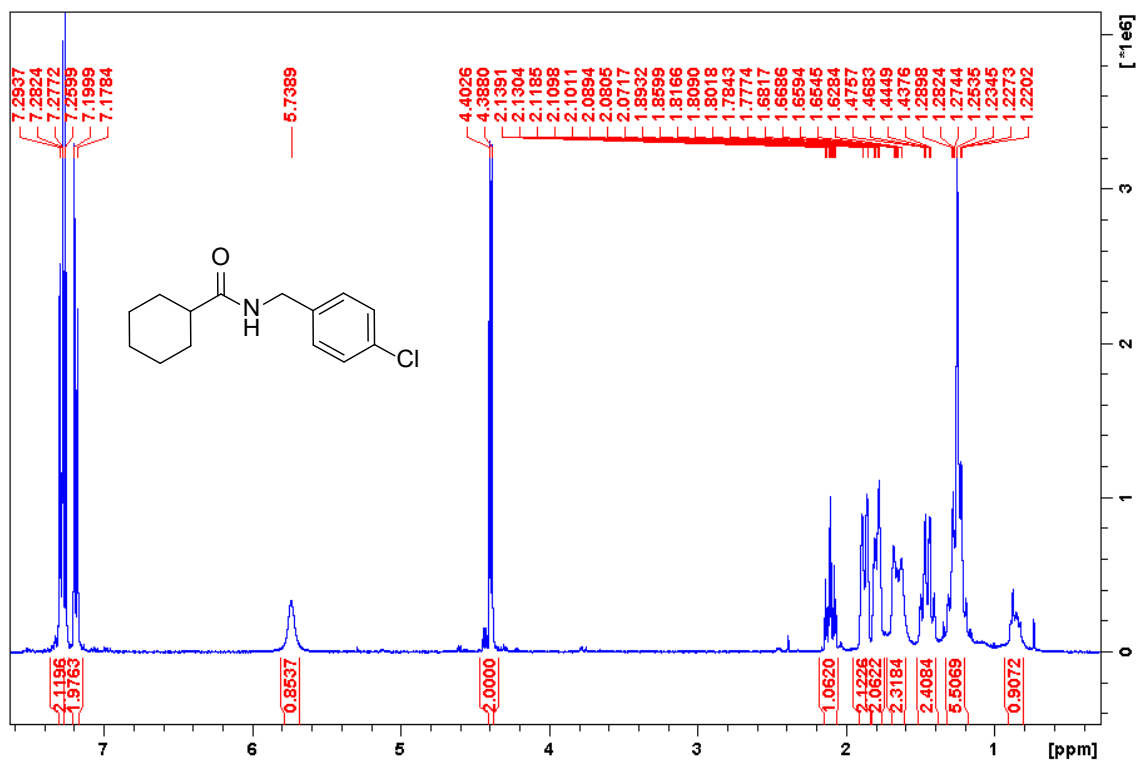



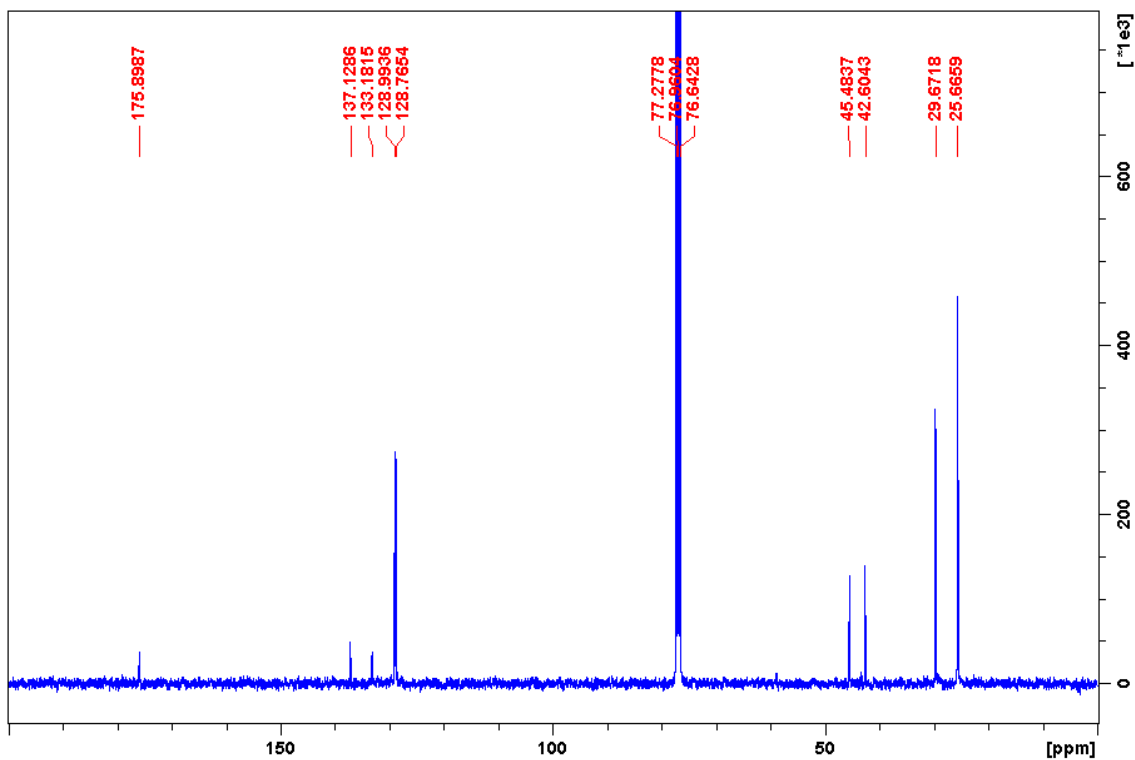

4-chloro-N-(2-morpholinoethyl)benzamide (*moclobemide*).

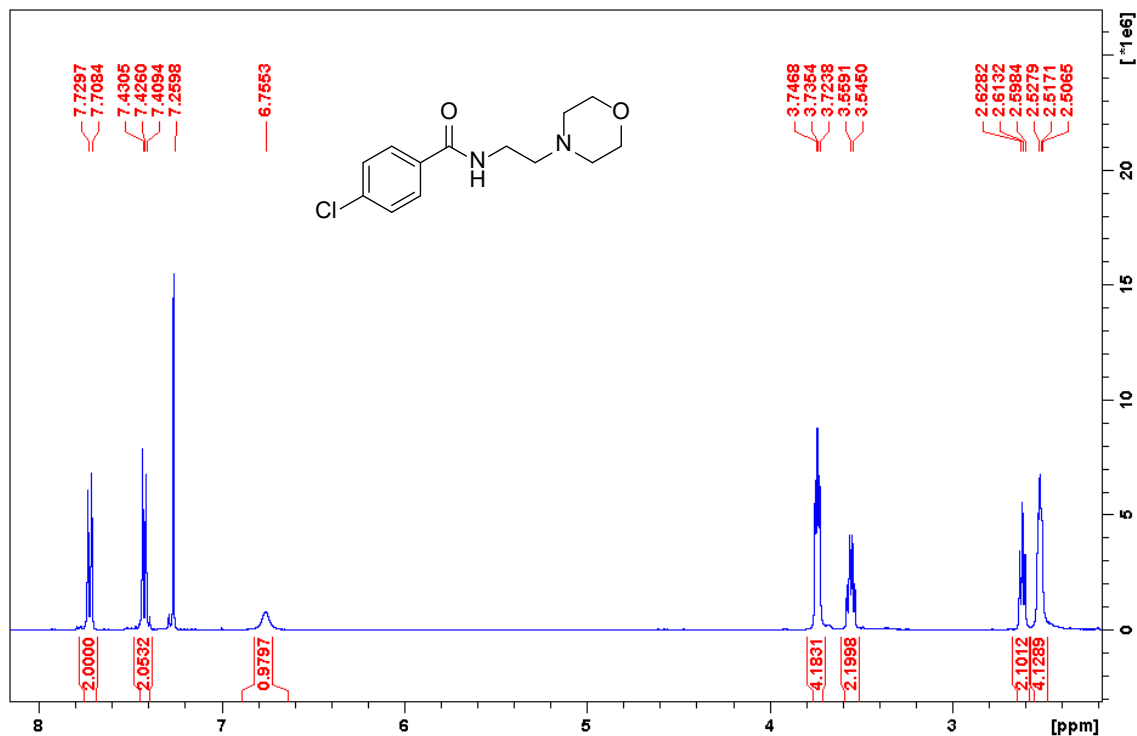

*N*-(4-((2-(dimethylamino)ethyl)amino)benzyl)-3,4-dimethoxybenzamide (*itopride*).

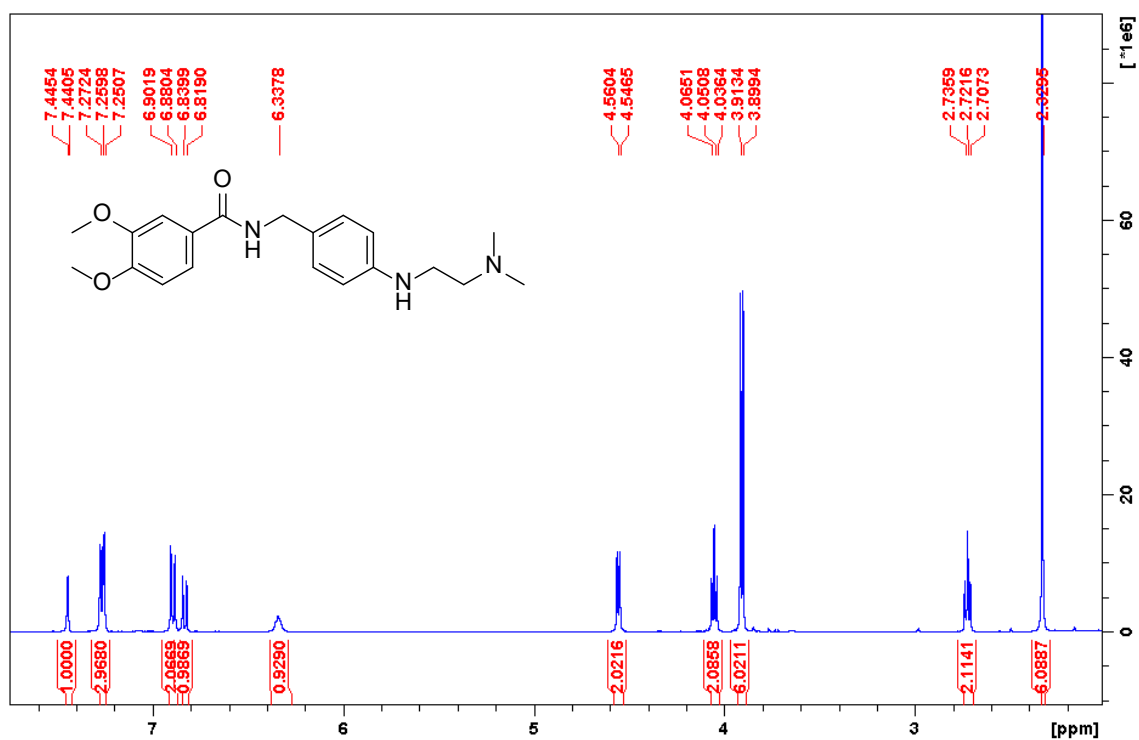

Supplement: d1ra04736a1.pdf [file d1ra04736a1.pdf]
